# Supplementary material for: Geometry and Segmentation of Cerberus Fossae, Mars: Implications for Marsquake Properties
Source: PubMed Central journal article supplement — J Geophys Res Planets. 2022 Jan 23;127(1):e2021JE007118. doi: 10.1029/2021JE007118 (PMC9285074; doi:10.1029/2021je007118), 2022-01-23
Supplement: JGRE-127-0-s001.pdf [file JGRE-127-0-s001.pdf]

**Geometry and segmentation of Cerberus Fossae, Mars: implications for  
marsquake properties**

Perrin, C.<sup>1,2\*</sup>, Jacob, A.<sup>1</sup>, Lucas, A.<sup>1</sup>, Myhill, R.<sup>3</sup>, Hauber, E.<sup>4</sup>, Batov, A.<sup>5,6</sup>, Gudkova, T.<sup>5</sup>,  
Rodriguez, S.<sup>1</sup>, Lognonné, P.<sup>1</sup>, Stevanović, J.<sup>7</sup>, Drilleau, M.<sup>8</sup>, Fuji, N.<sup>1</sup>

<sup>1</sup> Université de Paris, Institut de physique du globe de Paris, CNRS, F-75005 Paris, France

<sup>2</sup> Present address : Laboratoire de Planétologie et Géodynamique, UMR6112, Observatoire des Sciences de  
l'Univers de Nantes Atlantique, UMS3281, Université de Nantes, CNRS, 2 rue de la Houssinière - BP 92208,  
44322 Nantes Cedex 3, France

<sup>3</sup> School of Earth Sciences, University of Bristol, Wills Memorial Building, Queens Road, Bristol BS8 1RJ, UK

<sup>4</sup> DLR Institute of Planetary Research, Rutherfordstr. 2, 12489 Berlin, Germany

<sup>5</sup> Schmidt Institute of Physics of the Earth, Russian Academy of Sciences, Moscow, Russia

<sup>6</sup> V.A. Trapeznikov Institute of Control Sciences, Russian Academy of Sciences, Moscow, Russia

<sup>7</sup> AWE Blacknest, Brimpton, Reading, RG7 4RS, United Kingdom

<sup>8</sup> Institut Supérieur de l'Aéronautique et de l'Espace ISAE-SUPAERO, 10 Avenue Edouard Belin, 31400  
Toulouse, France

\* Corresponding author: [clement.perrin@univ-nantes.fr](mailto:clement.perrin@univ-nantes.fr)

**Contents of this file**

Supplementary Figures S1 and S2

Supplementary Text S1

**Introduction**

The Supporting Information includes one figure denoted Supplementary Figure S1 associated with Supplementary Text S1, that shows a detailed fault map of the Cerberus Fossae system and a description of the lateral segmentation we identified in this study. Supplementary Figure S2 shows in detail the topographic profiles determined along each calculated DEMs presented in Fig. 5, associated with the mean topographic profile.

### G1 fault segmentation

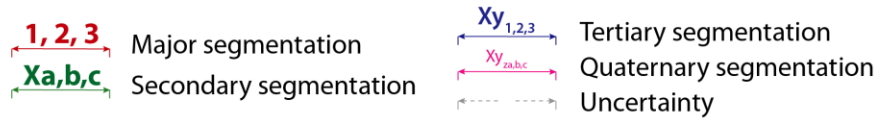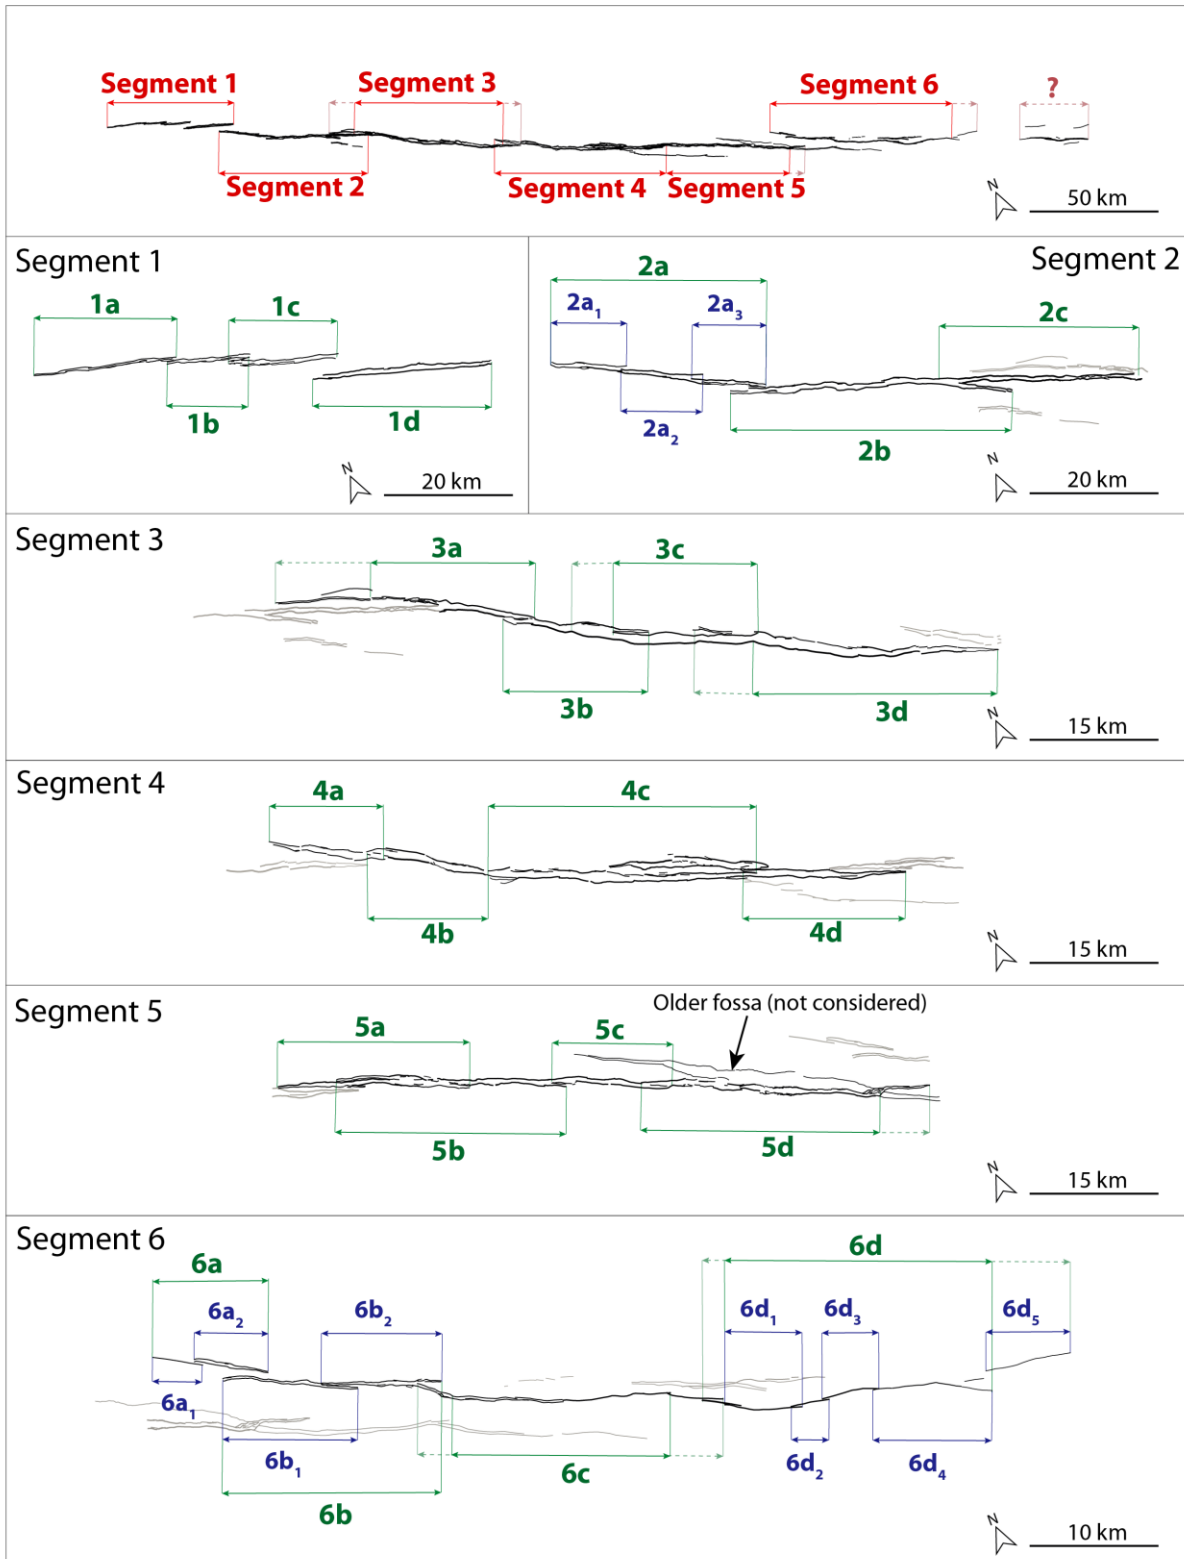

### G2 fault segmentation

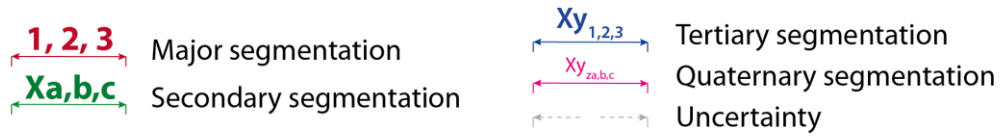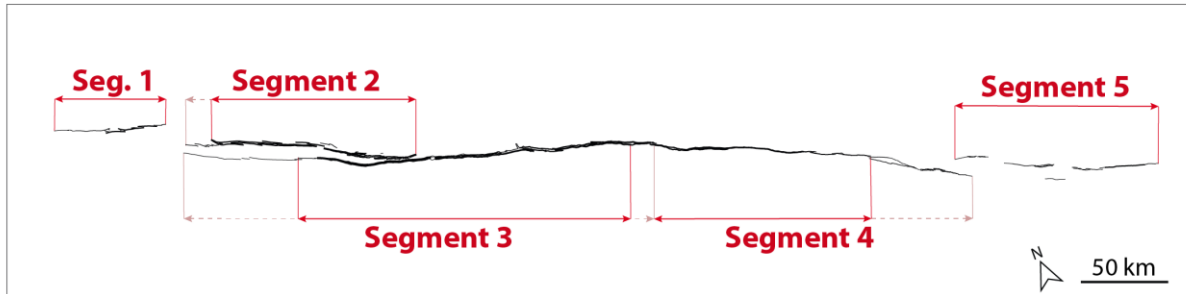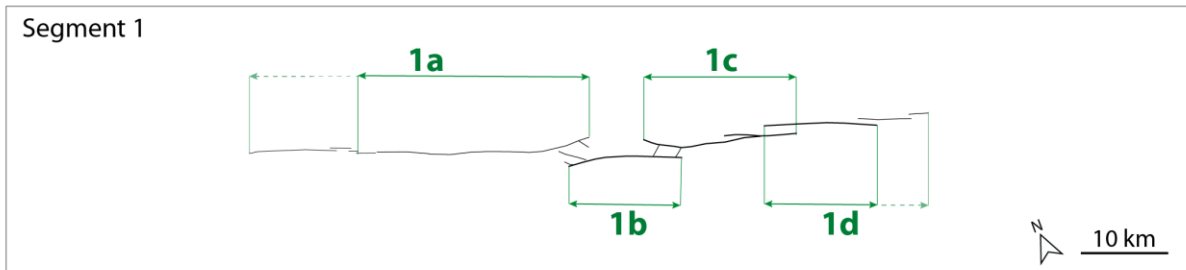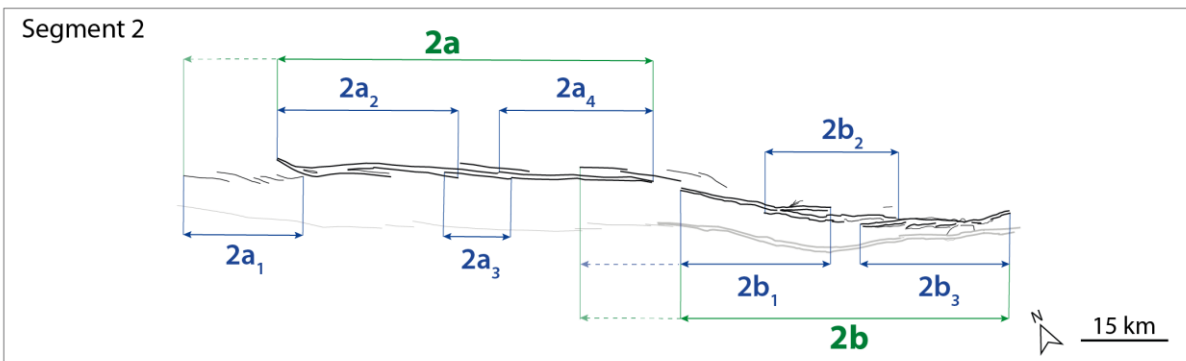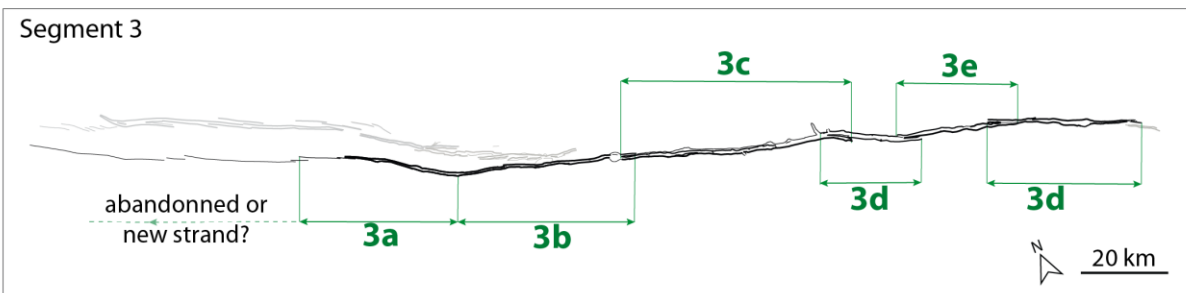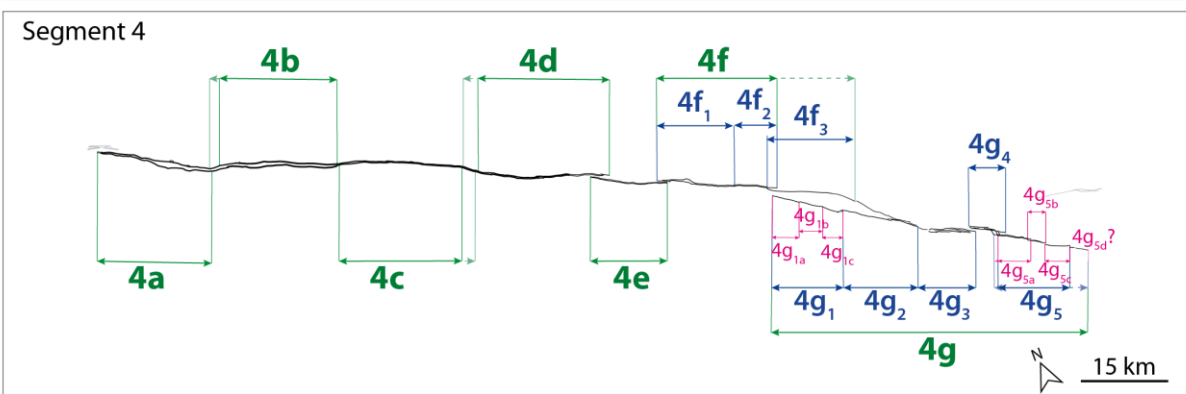

### G3 fault segmentation

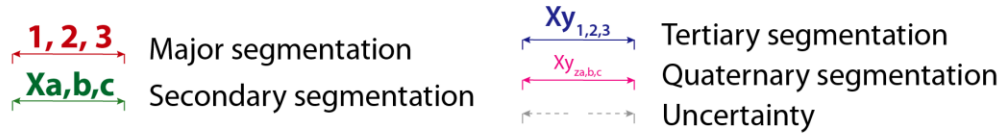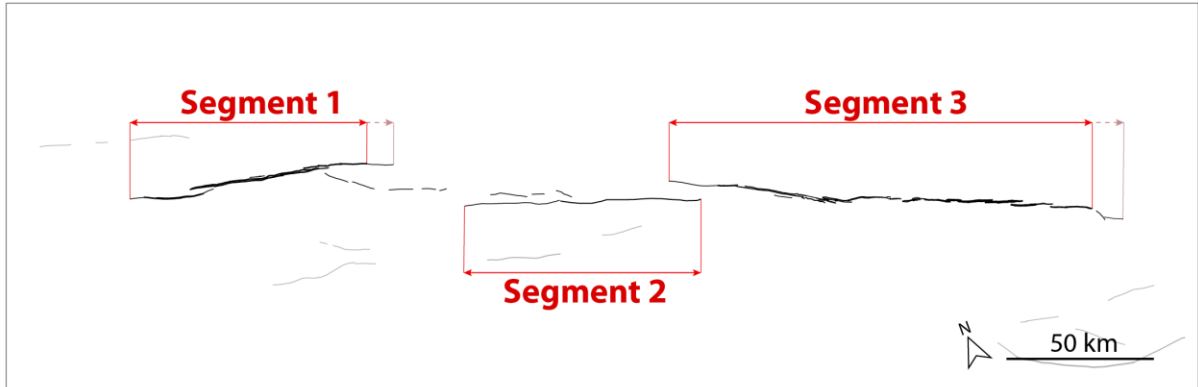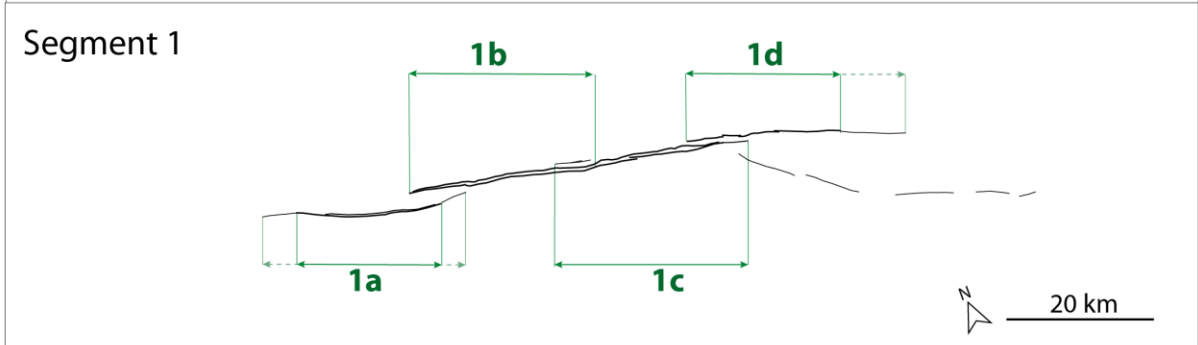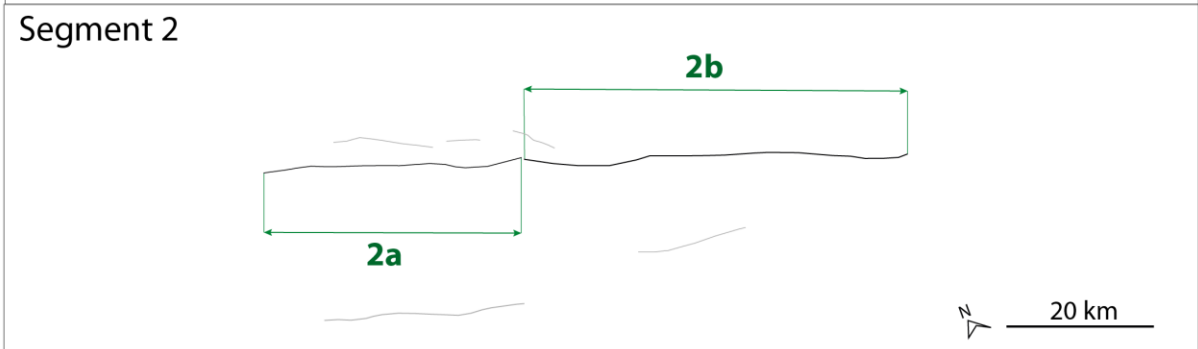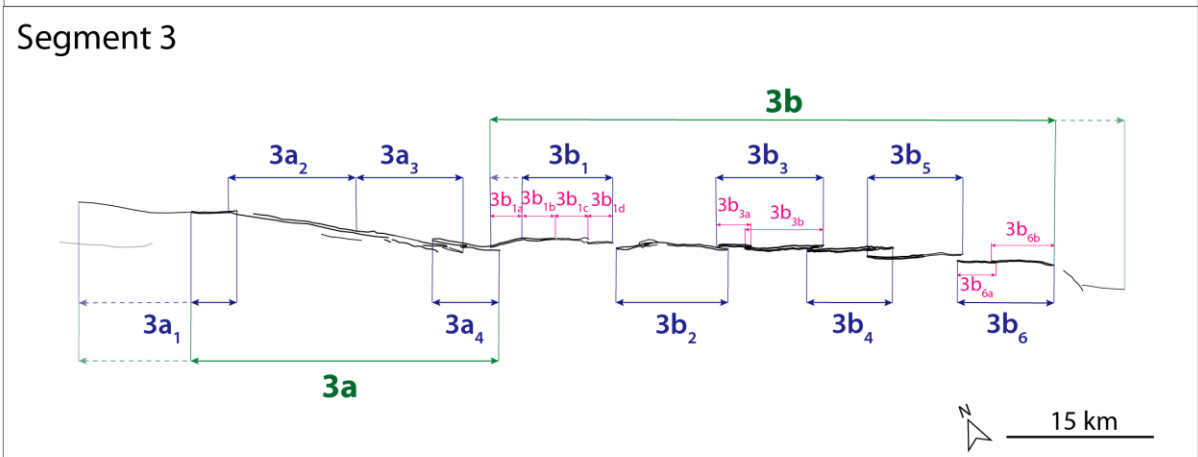

35 **Supplementary Figure S1:** Fault traces of G1, G2 and G3 of Cerberus Fossae and their  
36 associated segmentation (see G4 in Fig. 3). The trace lines thickness is related to its  
37 surface expression: the thicker is the line, the more evolved and well-established is the  
38 scarp. A closer view of the sub-segments in each major segment is shown. Grey traces  
39 depict the neighbor major segments, or unconsidered fossa parts. Up to four orders of  
40 segmentation have been identified. The major segments are indicated in red, the  
41 secondary segments in green, the tertiary segments in blue and the quaternary  
42 segments in magenta, and uncertainties are in dotted arrows. The detailed description of  
43 the segmentation is in Supplementary Text S1.  
44

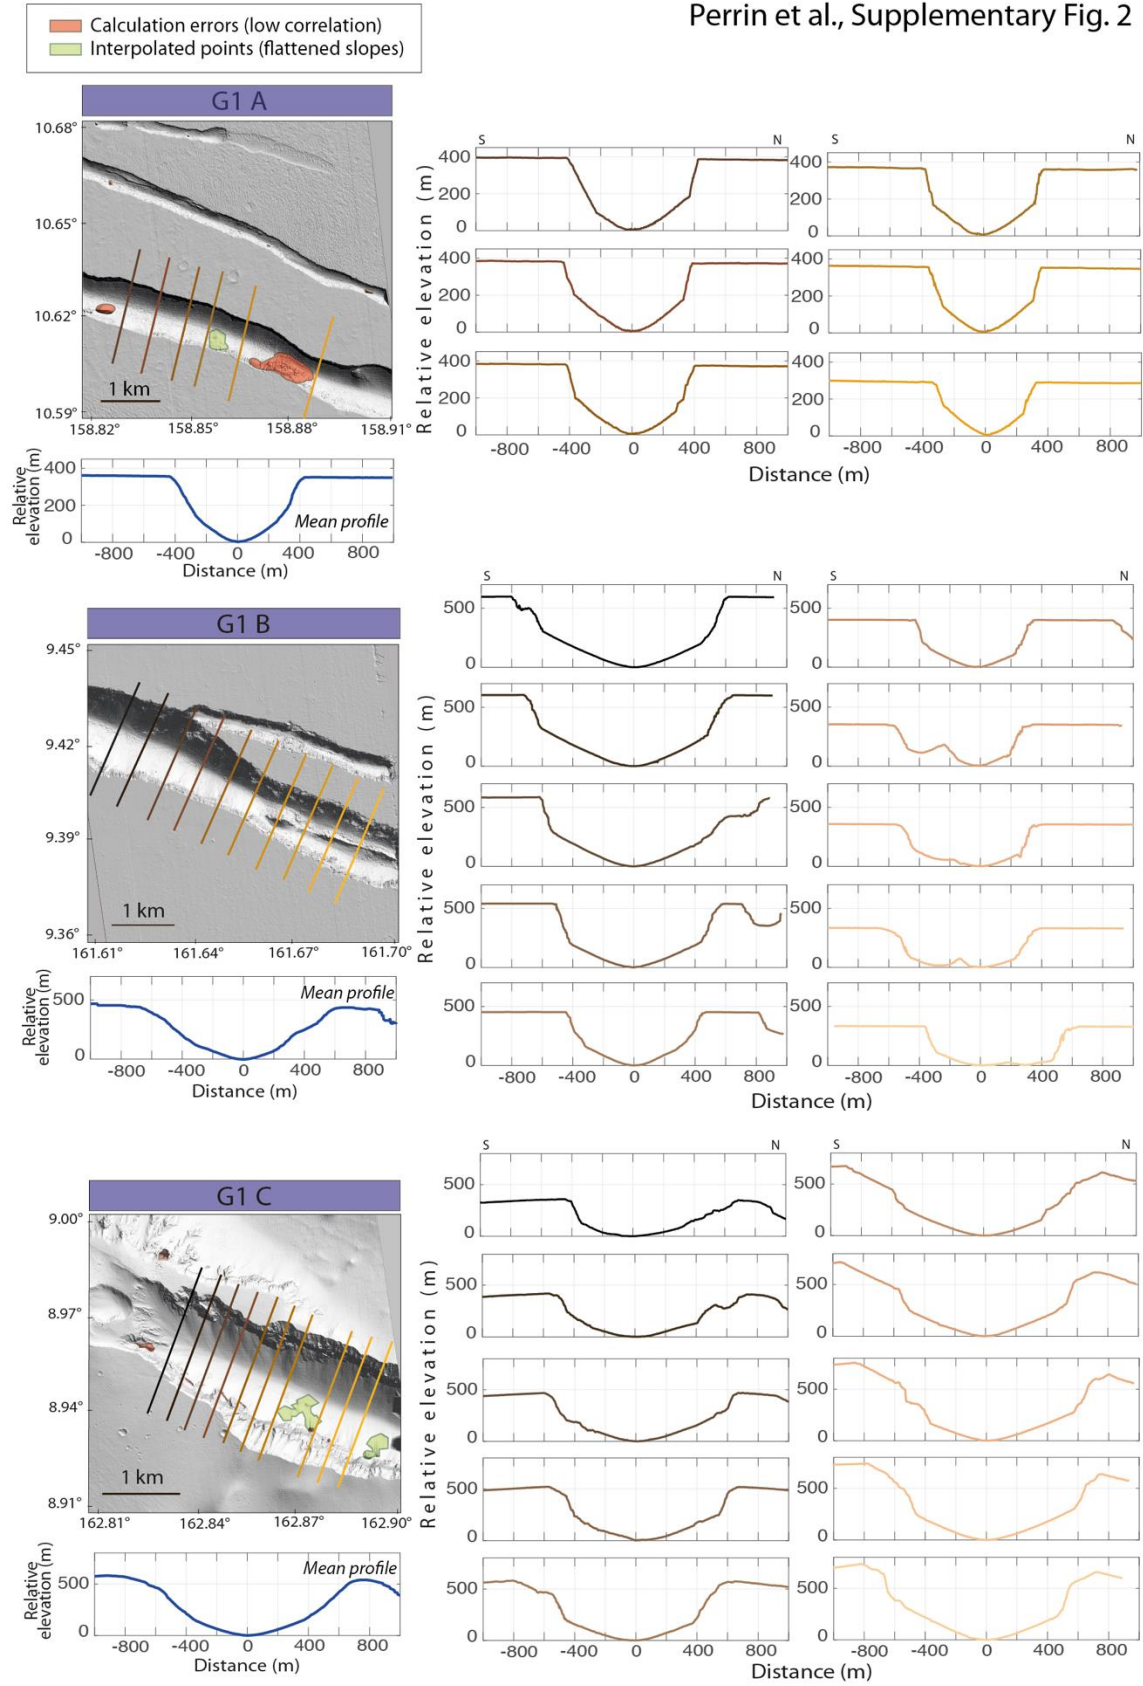

Perrin et al., Supplementary Fig. 2 (following)

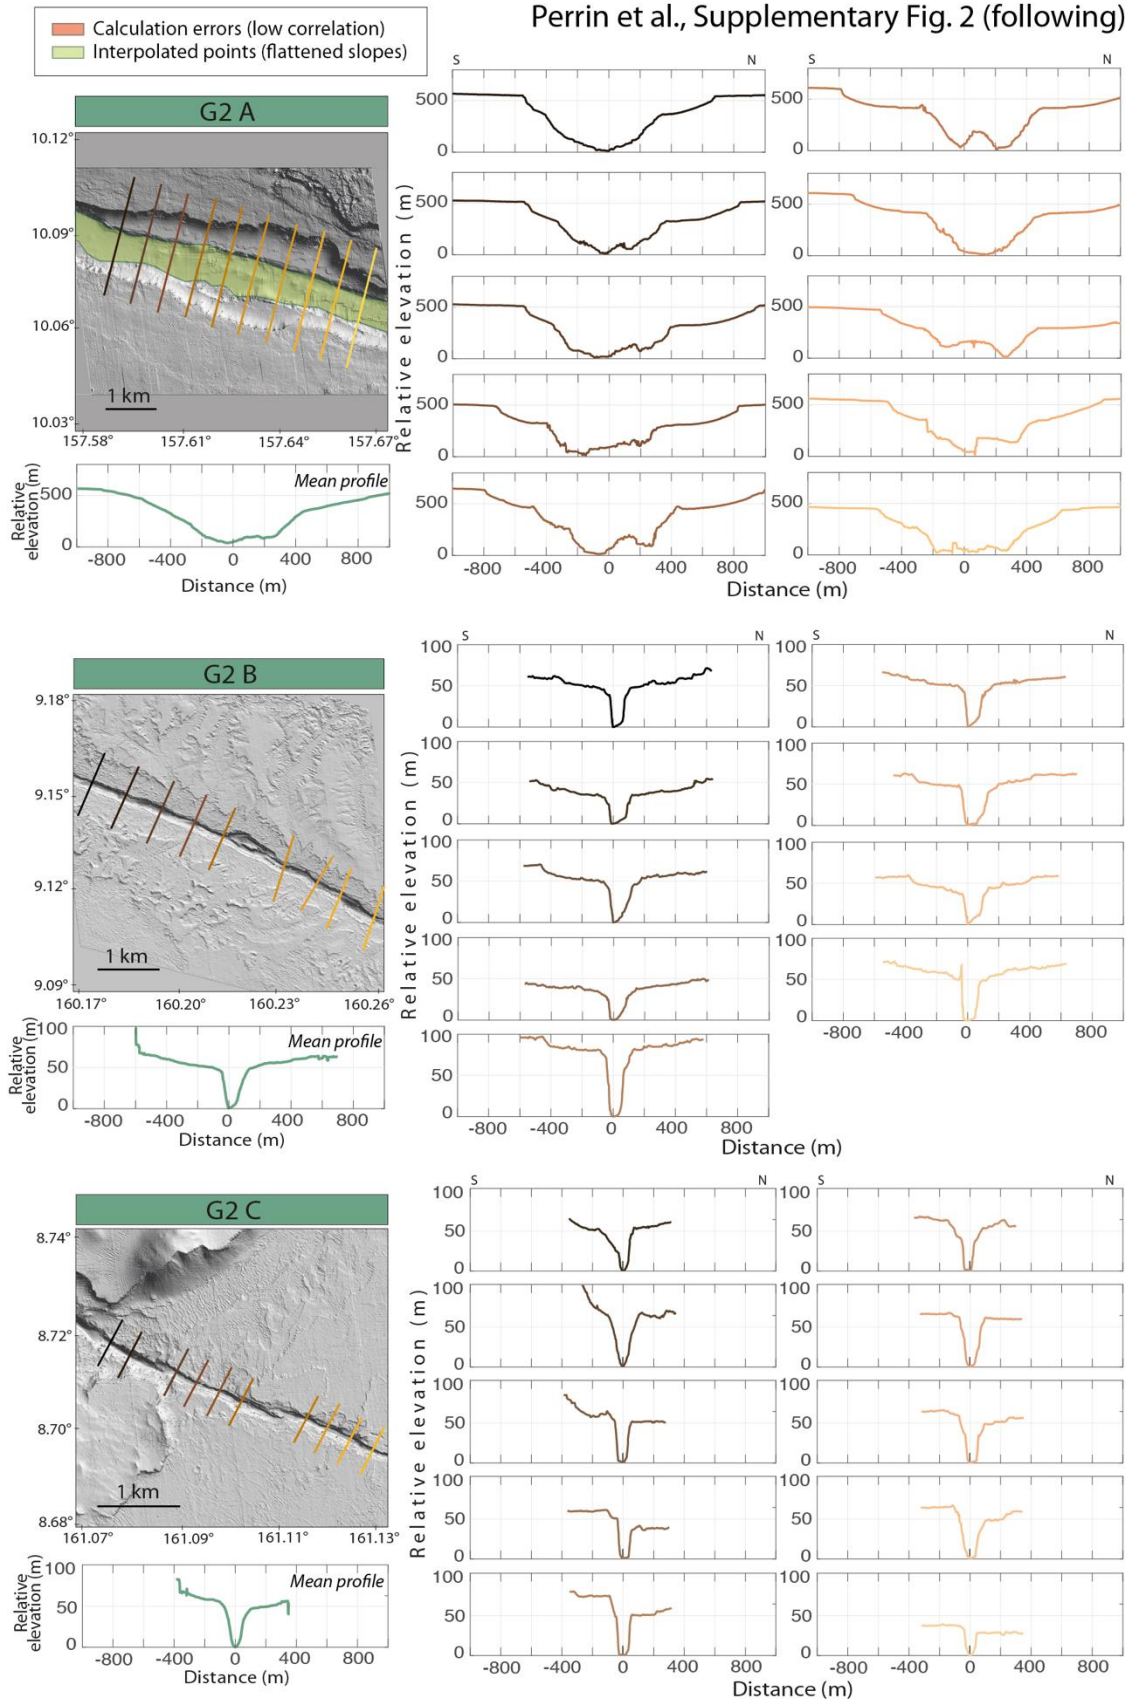

Perrin et al., Supplementary Fig. 2 (following)

- Calculation errors (low correlation)
- Interpolated points (flattened slopes)

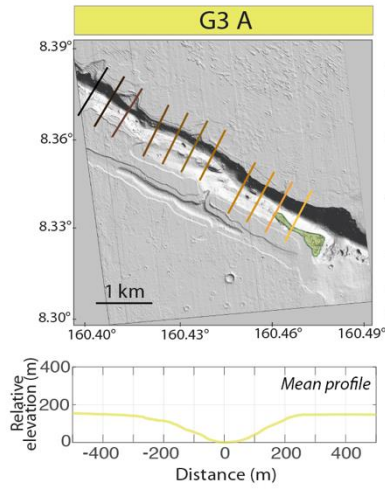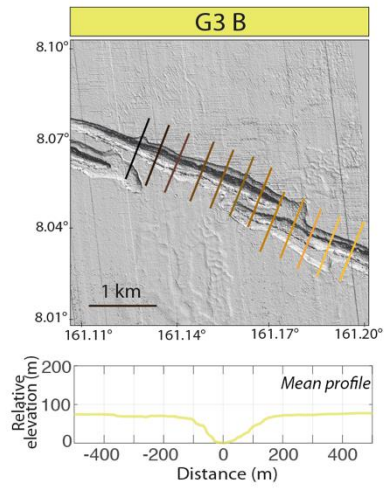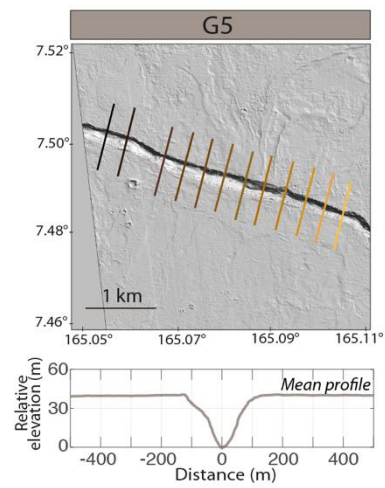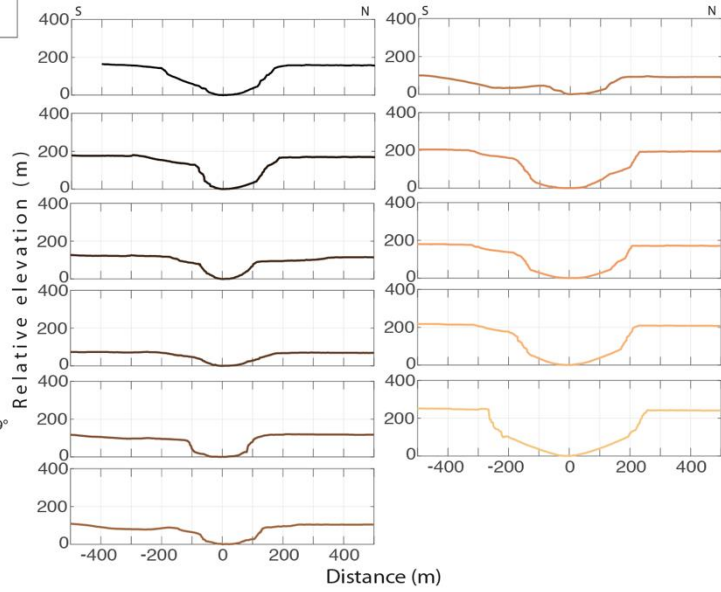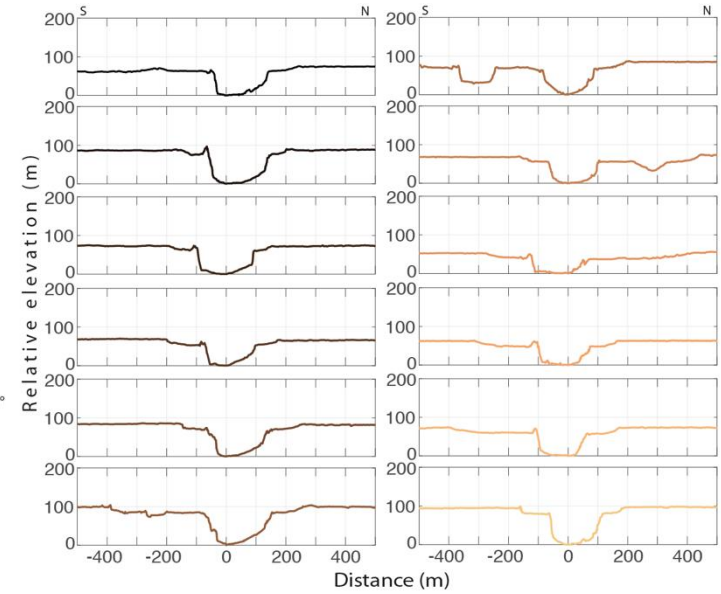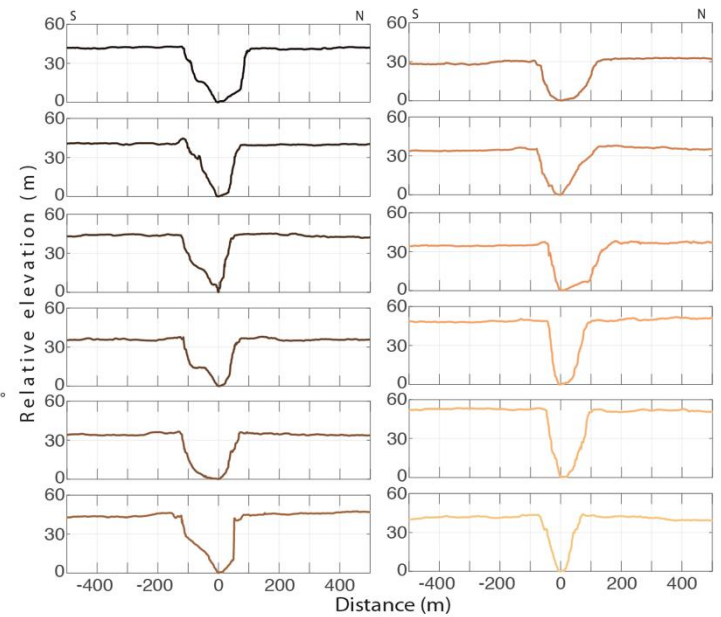



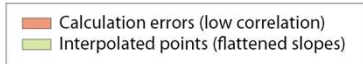

Perrin et al., Supplementary Fig. 2 (following)

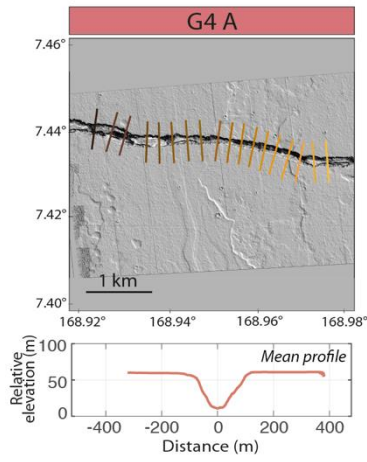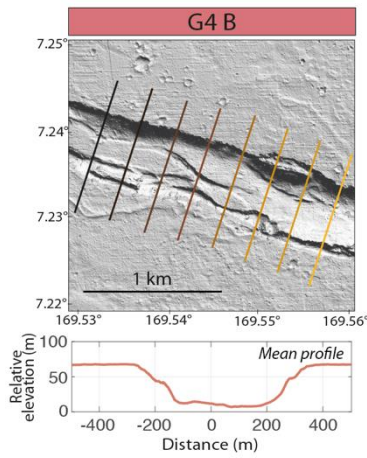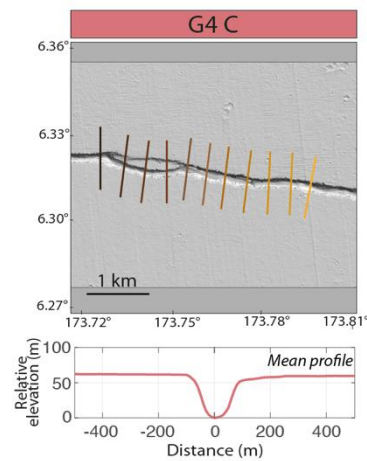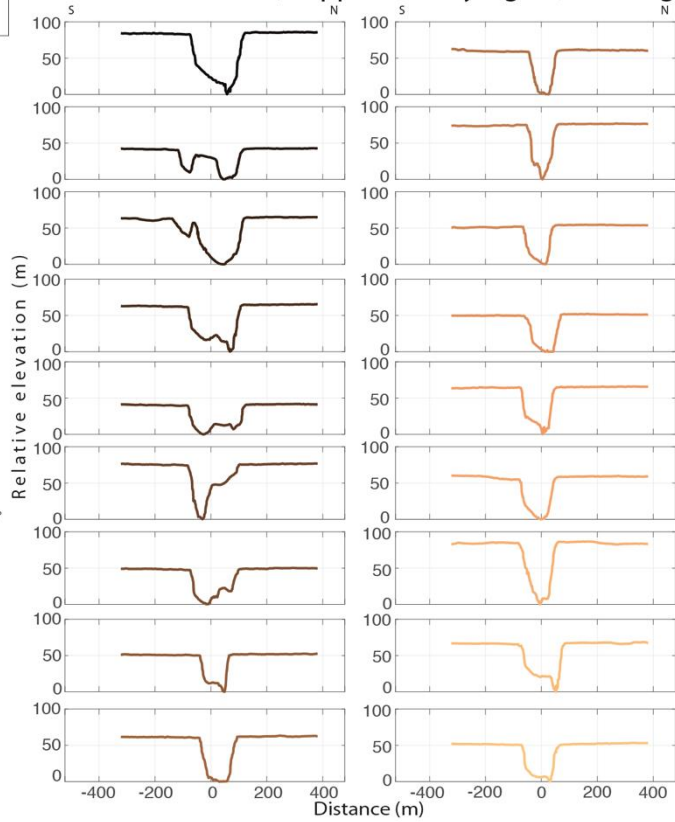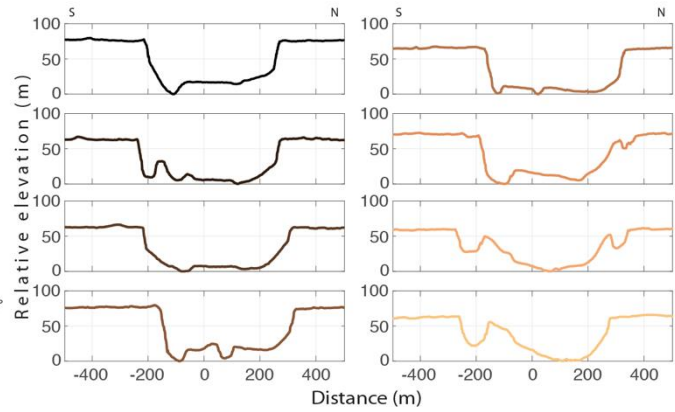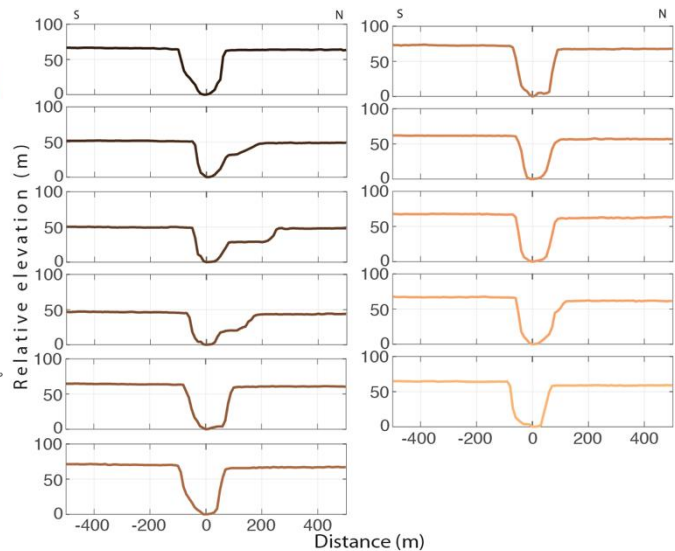

50 **Supplementary Figure S2:** Digital Elevation Models (1m/pixel) built from HiRISE  
51 stereo pairs along the five main fossae (G1, G2, G3, G4 and G5) of Cerberus Fossae (see  
52 locations on Fig. 1). Associated mean across strike topographic profiles are shown below  
53 each DEM. To the right of each image, successive topographic profiles are shown from  
54 West (black) to East (orange), showing the local lateral variation of throw and width of  
55 the fossae.  
56

57  
58  
59  
60

**Supplementary Text S1:** description of G1, G2, G3 and G4 segmentation. This text is associated with Supplementary Fig. 1.

61 *Fossa G1:*

62 G1 is about 520 km long and divided into six major colinear segments of 75 to 120 km in  
63 length. Major segment 1 is a short segment which corresponds to the NW tip of the  
64 Cerberus Fossae system. It is divided into four secondary segments (1a to 1d) of ~20 km  
65 long on average, separated by right-stepping jogs < 3km wide.

66  
67 Major segment 2 is isolated from segment 1 by a >4 km wide step-over. Major segments  
68 1 and 2 are connected through an oblique fault section that we consider as a splay fault  
69 of major segment 2 (secondary segment 2a). This section is oblique by ~10° compared  
70 to the main direction of major segments 1 and 2. Major segment 2 is thus divided into  
71 three secondary segments (2a, 2b and 2c) of 37 km long on average. Secondary  
72 segments 2a and 2b are connected through a small jog where the azimuth changes  
73 (~10°). Secondary segments 2b and 2c are well connected and are overlapping through  
74 a left-stepping jog. It is possible to observe tertiary segments in segment 2a (i.e., 2a<sub>1</sub>, 2a<sub>2</sub>  
75 and 2a<sub>3</sub>). They are 10 km long and separated by <1 km right-stepping jogs.

76  
77 Segment 3 is connected to segment 2 through a complex 10 km wide zone where sub-  
78 parallel secondary faults are observed, associated with a local change in the azimuth  
79 (~9°). Both segments are overlapping over a distance of 25 km. Four secondary  
80 segments are visible along major segment 3 (i.e., 3a to 3d), but the location of their tips  
81 is uncertain since they are well connected to each other. Still, it is possible to highlight  
82 trends inside the widened fossa. Thus, as for major segments 1 and 2, secondary  
83 segment 3a makes the connection between major segments 2 and 3 and is slightly  
84 oblique to the main fossa trend. Secondary segments 3a and 3b are well connected  
85 through a right-lateral jog and segment 3b is slightly oblique compared to the main fossa  
86 strike (~7°). This obliquity allows its eastern boundary with secondary segment 3c to be  
87 highlighted. A change of azimuth (~10°) and possibly a small, well connected, jog are  
88 then observed between secondary segments 3c and 3d. A small change in the azimuth is  
89 observed at the eastern tip of secondary segment 3d, possibly due to the connection  
90 with major segment 4.

91  
92 Major segments 3 and 4 are separated by a left-stepping jog of 3 km wide and an 8°  
93 change in the fossa strike. Four secondary segments (4a to 4d) are identified into major  
94 segment 4. They are ~26 km long on average. Secondary segments 4a and 4b are  
95 separated by a left-stepping jog; 4b and 4c are well connected but a slight bend of ~10°  
96 is observed. Secondary segment 4c could be considered to be two secondary segments  
97 but it is hard to distinguish them since the fossa morphology does not show  
98 discontinuities, with the exception of a sub-parallel fossa in the north. This secondary  
99 structure seems to connect at the eastern tip of secondary segment 4c, where a small jog  
100 is also observed in the main fossa trace. This zone corresponds to the transition between  
101 secondary segments 4c and 4d.

102  
103 The transition between major segments 4 and 5 is formed by a series of sub-parallel  
104 narrow fossae that are overlapping in a 12 km long and 3 km wide (total) zone.  
105 Secondary segment 5a marks this transition and overlaps with secondary segment 5b  
106 over almost half of its length. They are <1 km apart before merging in a wider fossa  
107 toward the East. Still the eastern tip of secondary segment 5a is distinguishable when  
108 both segments separate. A small change in the fossa strike (~13°) is observed between

109 secondary segments 5b and 5c, associated with a small (<1 km) left stepping jog. We  
110 consider the rest of the major segment as part of secondary segment 5d, since the fossa  
111 is so wide that is hard to distinguish clear structural discontinuities. The eastern tip of  
112 segment 5c shows a left-stepping jog of 1km wide, which seems to have reactivated an  
113 older fossa structure. This wide shallow fossa, labeled segment 9.1 in Vetterlein and  
114 Roberts (2010), is not considered in this study since its trace is less clear in the ground  
115 surface (older?) and cross-cut by the current fossa (segment 5d and see fig. 2a in the  
116 main text).

117  
118 A large step-over of 5 to 8.5 km wide is separating major segments 5 and 6. Major  
119 segment 6 is ~125 km long, and its width is much narrower than the other major  
120 segments (i.e., segment 6 would correspond to a less evolved fossa). Thus, it is possible  
121 to distinguish up to three scales of segmentation. Secondary segments 6a and 6b are  
122 separated by a 1.5 km wide right-stepping jog associated with a change in the fossa  
123 strike (10°). Secondary segment 6a might correspond to a splay fault of major segment  
124 6. Two tertiary segments are observed along secondary segments 6a and 6b, both  
125 separated by small left-stepping jogs. Secondary segments 6b and 6c are well connected  
126 through a two successive bends of 20°. A similar structure, associated with smaller scale  
127 fault segments, is observed between secondary segments 6c and 6d. Small left- and  
128 right-stepping jogs of <300m wide separate tertiary segments of secondary segment 6d  
129 (i.e., 6d<sub>1</sub> to 6d<sub>5</sub>). The eastern tip of major segment 6 bends and is associated with  
130 secondary splay faults that form a fan shape toward the east (20°).

131  
132 A small segment is situated in the eastern continuity of fossa G1, but 25 km away  
133 (labeled '?' on top panel of figure S1). We do not consider this segment as part of G1,  
134 but it might correspond to a new fault segment of G1 (i.e. recent volcanic activity,  
135 Horvath et al., 2021; Moitra et al., 2021), indicating the eastward direction of long-term  
136 propagation of the deformation.

### 137 138 Fossa G2:

139 G2 is ~610 km long, divided into four or five major segments. The uncertainty concerns  
140 major segment 1, which we consider as part of the fossa system, even if it is a short  
141 segment (~60 km) isolated from major segment 2 (underlap of 12 km long and 12 km  
142 wide). Its narrow trace is segmented into four secondary segments (1a to 1d), separated  
143 by right- and left-stepping jogs of ~1 km wide.

144  
145 Major segment 2 is the main northern branch of fossa G2. Major segment 2 is ~125 km  
146 long and composed of two secondary segments (2a and 2b), separated by a small gap in  
147 the main fossa trace (4 km) where small secondary faults associated with a small bend  
148 of the fossa trace (10°) are observed. Secondary segments 2a and 2b are divided into  
149 four and three tertiary segments, respectively. Tertiary segment 2a<sub>1</sub> corresponds to the  
150 western tip of major segment 2 and is formed by small left-stepping en-échelon  
151 fractures. Tertiary segments 2a<sub>2</sub>, 2a<sub>3</sub> and 2a<sub>4</sub> are fairly well connected via left-stepping  
152 jogs, that are distinguishable on each of the fossa shoulders. Tertiary segments 2b<sub>1</sub>, 2b<sub>2</sub>  
153 and 2b<sub>3</sub> are overlapping and have begun to connect each other through right-stepping  
154 jogs.

155  
156 Major segment 2 is oblique to major segment 3 and to the main fossa G2 trace (15°).  
157 They are separated by a small step-over of 1.5 km wide. Major segment 3 is 160 to 200  
158 km long. Its trace could be longer since a shallow discontinuous trace is sub-parallel to  
159 major segment 2 and is continuing to the West. This strand might correspond either to

160 an ancient structure that was active before the main activity 'jumped' and concentrated  
161 on major segment 2, or it shows the southern migration of the deformation from major  
162 segment 2. In either case, we do not consider this minor strand in the segmentation,  
163 since it is sub-parallel to major segment 2 (not colinear) and its trace is difficult to  
164 analyze. The main trace of major segment 3 is divided into six secondary segments (3a  
165 to 3f) separated either by bends of 15-20° or by small well-connected step-overs.  
166

167 The boundary between major segment 3 and major segment 4 cannot be clearly  
168 delineated. We based our choices on two main observations: i) the average strike of the  
169 fossa, since major segment 3 strikes N105°E over 150 km before slightly changing to  
170 N115°E along major segment 4 and the eastern part of the fossa (>200 km long); ii) the  
171 width of the fossa decreases significantly along major segment 4 and the eastern part of  
172 the fossa. Also, a small step over of 1.5 km wide is observed at the transition between  
173 both major segments.  
174

175 Major segment 4 is 135 to 180 km long. Its width decreases progressively toward the  
176 East, allowing small scale segmentation in the less evolved part of the fossa to be  
177 observed. It is divided into 7 secondary segments which are connected through bends  
178 (4a-4b, 4b-4c, 4c-4d; 5-10°) or separated by small jogs (4d-4e, 4e-4f, 4f-4g; <1km wide).  
179 Also, the azimuth changes between secondary segments 4f and 4g (10°). Secondary  
180 segments 4e and 4f are possibly one single secondary segment, but we separated them  
181 based the definition of other secondary segments (step-over width between 4d-4e has a  
182 similar dimension to the step-over between 4e-4f). Secondary segment 4f is sub-divided  
183 into three tertiary segments of 7-15 km long (4f<sub>1</sub>, 4f<sub>2</sub> and 4f<sub>3</sub>). They are connected  
184 through small bends and jogs (<500 m). Secondary segment 4g is sub-divided into five  
185 tertiary segments of 12 km long on average (4g<sub>1</sub> to 4g<sub>5</sub>), separated by small right- and  
186 left-stepping jogs of ~500m and small bends (<10°). At both tips, tertiary segments 4g<sub>1</sub>  
187 and 4g<sub>5</sub> are divided into three and three to four quaternary segments, respectively (i.e.,  
188 4g<sub>1a</sub> to 4g<sub>1c</sub> and 4g<sub>5a</sub> to 4g<sub>5d</sub>). They are separated by 100-200m wide jogs and local bends  
189 in the fossa trace (10-12°).  
190

191 An 8 to 10 km wide step-over separates major segments 4 and 5. Major segment 5 is  
192 ~110 km long. Its surface trace is tenuous and discontinuous, thus we did not analyze its  
193 sub-segmentation.  
194

### 195 Fossa G3:

196 G3 is ~260 km long and is divided into three isolated major segments, separated by  
197 large step-overs (5 to 10 km wide). The inter-segment zone between major segments 1  
198 and 2 is 6 to 10 km wide and 18 km long, where shallow surface traces are present.  
199 These traces might correspond to secondary splay faults at the eastern and western tips  
200 of major segments 1 and 2 respectively. However, these strands were not taken into  
201 account because they are discontinuous and uncertain.  
202

203 Major segment 1 is ~70 km long, sub-divided into four secondary segments of 21 km  
204 long on average (1a to 1c). They are separated by 1-2 km left-stepping wide more or less  
205 connected jog.  
206

207 Major segment 2 is ~60 km long, and its trace is very shallow. It is possibly divided into  
208 two secondary segments 2a and 2b, that are defined based on their trace: secondary  
209 segment 2a is discontinuous, associated with an aligned pit chain, while secondary  
210 segment 2b is a more evolved fossa.  
211

212 Major segment 3 is ~110 km long, and is sub-divided into two secondary segments that  
213 are striking N120°E (3a) and N110°E (3b), connected through two successive bends in  
214 the fossa trace (~20°). Secondary segment 3a is sub-divided into five tertiary segments  
215 (3a<sub>1</sub> to 3a<sub>5</sub>) connected through a small bend (10°; 3a1-3a2) associated with a structural  
216 discontinuity in the fault trace (hill), a well-connected jog (3a2-3a3) and a not well-  
217 connected jog of 300 m wide (3a3-3a4). Secondary segment 3b is sub-divided into six  
218 tertiary segments of 12 km long (3b<sub>1</sub> to 3b<sub>6</sub>), separated by <700 m wide step-overs. It is  
219 possible to identify four quaternary segments in tertiary segment 3b1 (i.e., 3b<sub>1a</sub> to 3b<sub>1d</sub>),  
220 and two quaternary segments in both tertiary segments 3b3 (3b<sub>3a</sub> and 3b<sub>3b</sub>) and 3b6  
221 (3b<sub>6a</sub> and 3b<sub>6b</sub>). They are separated by ~100 m wide step-over and a small bend (10°).  
222 Minor oblique splay faults are observed at the eastern tip of major segment 3 and G3.

223

#### 224 Fossa G4:

225 G4 is ~435 km long and is divided into three main segments of 100 to 180 km long,  
226 separated by step overs >3 km wide. Major segment 1 is ~100 km long, and is divided  
227 into three secondary segments, connected by major bends in the fossa trace (20° 1a-1b;  
228 15° 1b-1c). Secondary segment 1a is subdivided into four tertiary segments (1a<sub>1</sub> to 1a<sub>4</sub>),  
229 which have slightly different fault strikes (5 to 10°), and are linked by fairly well-  
230 connected jogs with local bends up to 20°. Secondary segment 1b is divided into three  
231 tertiary segments (1b<sub>1</sub>, 1b<sub>2</sub> and 1b<sub>3</sub>), connected similarly to secondary segment 1a  
232 (bends and well-connected jogs). The trace of secondary segment 1c is less pronounced  
233 toward the East. It is divided into three tertiary segments separated by small jog (1c1-  
234 1c2; 200 m wide) and a change in the azimuth (1c2-1c3; ~10°). Tertiary segment 1c3  
235 might correspond to a minor splay of secondary segment 1c.

236

237 Major segment 2 is ~135 km long and is divided into two isolated secondary segments  
238 2a and 2b, separated by a left-stepping jog of 2 km wide. Tertiary segments 2a<sub>1</sub>, 2a<sub>2</sub>, 2a<sub>3</sub>  
239 and 2a<sub>4</sub> are well connected along secondary segment 2a (slight bends up to 10° and  
240 <500m wide relay zones), while tertiary segments 2b<sub>1</sub>, 2b<sub>2</sub>, 2b<sub>3</sub> and 2b<sub>4</sub> are not well  
241 connected along secondary segment 2b (step-overs of 500 m to 1 km wide). Quaternary  
242 segments are thus observed along tertiary segments 2b<sub>1</sub> (2b<sub>1a</sub> and 2b<sub>1b</sub>), 2b<sub>2</sub> (2b<sub>2a</sub>, 2b<sub>2b</sub>  
243 and 2b<sub>2c</sub>), 2b<sub>3</sub> (2b<sub>3a</sub>, 2b<sub>3b</sub> and 2b<sub>3c</sub>) and 2b<sub>4</sub> (2b<sub>4a</sub>, 2b<sub>4b</sub> and 2b<sub>4c</sub>). They are 7 km long on  
244 average, and separated by small <300 m wide step-overs and slight azimuth changes <  
245 10°.

246

247 Major segment 3 is about 180 km long, but its total length is uncertain. Indeed, its trace  
248 is mainly formed by right-stepping jogs, while its eastern tip is formed by left-stepping  
249 en échelon fractures with an average azimuth slightly oblique compared to major  
250 segment 3. We consider this section as part of major segment 3 (secondary segment 3e),  
251 but it might correspond to a future new major segment. Major segment 3 is thus divided  
252 into five secondary segments 3a to 3e, separated by step-overs of <3 km wide, except  
253 between 3d-3e (~4 km wide). Tertiary segments are observed along all secondary  
254 segments (four along 3a, three along 3b, 3c and 3e, two along 3d). They are all separated  
255 by small step-over of <1 km wide or connected through slight bends (<10°). Quaternary  
256 segments are observed in most parts of major segment 3, especially in the eastern and  
257 less evolved part of the fossa (i.e., in secondary segments 3c, 3d and 3e). They are  
258 separated by small step overs <300m wide and azimuth changes <10°.

259

#### 260 Fossa G5:

261 G5 is at least 200 km long and is situated about 20 and 35 km away from G2 and G1,  
262 respectively. Its trace is very discontinuous. Thus, we did not analyze its segmentation.  
263  
264

265 **References:**

266 Horvath, D.G., Moitra, P., Hamilton, C.W., Craddock, R.A., and Andrews-Hanna, J.C., 2021,  
267 Evidence for geologically recent explosive volcanism in Elysium Planitia, Mars:  
268 Icarus, v. 365, p. 114499, doi: 10.1016/j.icarus.2021.114499.

269 Moitra, P., Horvath, D.G., and Andrews-Hanna, J.C., 2021, Investigating the roles of  
270 magmatic volatiles, ground ice and impact-triggering on a very recent and highly  
271 explosive volcanic eruption on Mars: Earth and Planetary Science Letters, v. 567, p.  
272 116986, doi: 10.1016/j.epsl.2021.116986.

273 Vetterlein, J., and Roberts, G.P., 2010, Structural evolution of the Northern Cerberus  
274 Fossae graben system, Elysium Planitia, Mars: Journal of Structural Geology, v. 32, p.  
275 394–406, doi: 10.1016/j.jsg.2009.11.004.

276
